# Supplementary material for: Using CellMiner 1.6 for Systems Pharmacology and Genomic Analysis of the NCI-60
Source: Oxford University Press journal article supplement (doi:10.1158/1078-0432.ccr-15-0335), 2015-06-05
Supplement: 10780432ccr150335-sup-144988_1_supp_0_np2k0w.docx [file 10780432ccr150335-sup-144988_1_supp_0_np2k0w.docx]

| **Supplementary Table S1.** Cell line data comparison across three institutes | | | |
| --- | --- | --- | --- |
|  |  |  |  |
| **Data type** | **NCI-60 a** | **CCLE b** | **CGP c** |
| Number of CL | 60 | 1036 | 727 |
| Number of drugs | >40,000, 40-60 CL | 24, 307-492 CL | 138, 291-617 CL |
| Gene expression | whole genome | whole genome | whole genome |
| miRNA expression | 422 | 16 | NA |
| aCGH | whole genome | 23,316 genes, 1043 CL | 426 genes, 624 CL |
| DNA methylation | done (in prep) | NA | NA |
| Exome sequencing | whole genome | 1651 genes, 905 CL | 71 genes, 624 CL |
| a The NCI-60 from the Developmental Therapeutics Program, http://dtp.nci.nih.gov/, | | | |
| and http://discover.nci.nih.gov/cellminer/. | | |  |
| b The Cancer Cell Line Encyclopedia (CCLE) from the Broad Institute, | | | |
| http://www.broadinstitute.org/software/cprg/?q=node/11. | | |  |
| c The Cancer Genome Project (CGP) from the Wellcome Trust Sanger Institute, | | | |
| http://www.sanger.ac.uk/genetics/CGP/cosmic/. | | |  |
| Abbreviations: aCGH, array comparative genomic hybridization; CL, cell lines; in prep, in preparation; NA, not available. | | | |
|  | |  |  |
